# Supplementary material for: Rapid Generation of MicroRNA Sponges for MicroRNA Inhibition
Source: PLoS One. 2012 Jan 6;7(1):e29275. doi: 10.1371/journal.pone.0029275 (PMC3253070; doi:10.1371/journal.pone.0029275)
Supplement: Table S1 — Oligos used. (XLS) [file pone.0029275.s007.xls]

## Sheet: Blad1
Table S1. Used oligos.
Oligo Name	Sequence	Size
Linker oligos
pMSCV-PIG SanD1 linker S	5'-phos-TCGAGCTGGTTAACGACGGGTCCCGACGTTTAAACGACG-3'	39nt
pMSCV-PIG SanD1 linker AS	5'-phos-AATTCGTCGTTTAAACGTCGGGACCCGTCGTTAACCAGC-3'	39nt
Sponge oligos
miR-19-P sponge S #	5’-phos-GTCCCTCAGTTTTGCATAGATTTGCACAAATTTCAGTTTTGCATGGATTTGCACAGG-3'	57nt
miR-19-P sponge AS	5'-phos-GACCCTGTGCAAATCCATGCAAAACTGAAATTTGTGCAAATCTATGCAAAACTGAGG-3'	57nt
miR-19-B sponge S ##	5'-phos-GTCCCTCAGTTTTGCCCTATTTGCACAAATTTCAGTTTTGCCCTATTTGCACAGG-3'	55nt
miR-19-B sponge AS	5'-phos-GACCCTGTGCAAATAGGGCAAAACTGAAATTTGTGCAAATAGGGCAAAACTGAGG-3'	55nt
miR-92a-P sponge S	5'-phos-GTCACAGGCCGGGACAAGTGCAATAGGTCACAGGCCGGGACAAGTGCAATAG-3'	52nt
miR-92a-P sponge AS	5'-phos-GACCTATTGCACTTGTCCCGGCCTGTGACCTATTGCACTTGTCCCGGCCTGT-3'	52nt
miR-92a-B sponge S	5'-phos-GTCACAGGCCGGTTTAGTGCAATAGGTCACAGGCCGGTTTAGTGCAATAG-3'	50nt
miR-92a-B sponge AS	5'-phos-GACCTATTGcACTAAACCGGCCTGTGACCTATTGCACTAAACCGGCCTGT-3'	50nt
miR-155-P sponge S	5'-phos-GTCCACCCCTATCACGATTAGCATTAAAATTACCCCTATCACGATTAGCATTAA-3'	54nt
miR-155-P sponge AS	5'-phos-GACTTAATGCTAATCGTGATAGGGGTAATTTTAATGCTAATCGTGATAGGGGTG-3'	54nt
miR-155-B sponge S	5'-phos-GTCCACCCCTATGGAATTAGCATTAAAATTACCCCTATGGAATTAGCATTAA-3'	52nt
miR-155-B sponge AS	5'-phos-GACTTAATGCTAATTCCATAGGGGTAATTAATTTGCTAATTCCATAGGGGTG-3'	52nt
Colony PCR primers
pMSCV-PIG-sp F	5'-TTTATCCAGCCCTCACTCC-3'	19nt
pMSCV-PIG-sp R	5'-TTGTGTAGCGCCAAGTGCC-3'	19nt
Quantitative PCR primers
pMSCV-PIG-sp Sponge general F	5'-ACTTGGCGCTACACAAGTGG-3'	20nt
pMSCV-PIG-sp Sponge general R	5'-CTACCGGTGGATGTGGAATG-3'	20nt
pMSCV-PIG-sp miR-155 sponge F	5'-AATTAGCATTAAGTCCCGACGTTT-3'	24nt
pMSCV-PIG-sp miR-155 sponge R	5'-CAGACTGCCTTGGGAAAAGC-3'	20nt
pMSCV-PIG-sp GFP F	5'-TCCGCCCTGAGCAAAGAC-3'	18nt
pMSCV-PIG-sp GFP R	5'-GAACTCCAGCAGGACCATGTG-3'	21nt
Renilla F	5'-CCCCGAGCAACGCAAAC-3'	17nt
Renilla R	5'-GCACGTTCATTTGCTTGCA-3'	19nt
Firefly F	5'-CGGCTTCGGCATGTTCA-3'	17nt
Firefly R	5'-ACATCAGCACCACCCGAAA-3’	19nt
U6 F	5'-TTCGGCAGCACATATACTAA-3'	20nt
U6 R	5'-AATATGGAACGCTTCACGAA-3'	20nt
U6 probe	5'-CCCTGCGCAAGGATGACACGC-3'	21nt
RPII F	5'-CGTACGCACCACGTCCAAT-3'	19nt
RPII R	5'-CAAGAGAGCCAAGTGTCGGTAA-3'	22nt
RPII probe	5'-TACCACGTCATCTCCTTTGATGGCTCCTAT-3'	30nt
miR-19 inhibitor oligos
miR-19a inhibitor	5'-+T*G*C*+A*T*A*+G*A*T*+T*T*G*+C*A*C*+A-3'	16nt
miR-19b inhibitor	5'-+T*G*C*+A*T*G*+G*A*T*+T*T*G*+C*A*C*+A-3'	16nt
miR-16 inhibitor	5'-+T*A*T*+T*T*A*+C*G*T*+G*C*T*+G*C*T +A-3'	16nt
P = perfect antisense miRNA binding sites, B = bulged antisense miRNA binding sites, S = sense strand, AS = antisense strand, F = forward primer and R =
reverse primer, phos = phosphate, # the miR-19-P sponge oligo contains one perfect site for miR-19a and one perfect site for miR-19b, ## the miR-19-B sponge
oligo contains 2 identical miRNA binding sites that can bind both miR-19a and miR-19b, + = LNA modification, * = phosphorothioate modification.
